# Supplementary material
Source: publisher figshare collection journal article supplement (https://frontiersin.figshare.com/ndownloader/files/17620151)
Supplement: Supplementary file [file 17620151]

Supplementary file

>sp|P22466|GALA\_HUMAN Galanin peptides OS=Homo sapiens OX=9606

GN=GAL PE=1 SV=3

MARGSALLLASLLAAALSASAGLWSPAKEKRGWTLNSAGYLLGPHAVGNHRSFSDKNGLTSKRELRP  
EDDMKPGSFDRSIPENNIMRTIIEFLSFLHLKEAGALDRLDLPAAASSEDIER

>NP\_150240.1 galanin peptides preproprotein [Rattus norvegicus]

MARGSVILLAWLLLVATLSATLGLGMPTKEKRGWTLNSAGYLLGPHAIDNHRSFSDKHGLTGKRELPL  
EVEEGRLGSAVPLPESNIVRTIMEFLSFLHLKEAGALDSLPGIPLATSSDLEQS

>NP\_776339.1 galanin peptides preproprotein [Bos taurus]

MPRGSVLLLASLLAAALSATLGLGSPVKEKRGWTLNSAGYLLGPHALDSHRSFQDKHGLAGKRELEP  
EDEARPGSFDRPLAENNVVRTIIEFLTFLHLKDAGALERLPSLPTAESAEADAERS

>NP\_999399.1 galanin peptides preproprotein [Sus scrofa]

MPRGCALLLASLLASALSATLGLGSPVKEKRGWTLNSAGYLLGPHAIDNHRSFHDKYGLAGKRELEP  
EDEARPGGFDRLQSEDKAIRTIMEFLAFLHLKEAGALGRPLGLPSAASSEDAGQS

>XP\_014373265.1 galanin peptides isoform X2 [Alligator sinensis]

MQKCTGLLFLSLILCATLSETFGLVLSAKEKRGWTLNSAGYLLGPHAIDNHRSFNEKHGLAGKREIQP  
EEDMKSGVLGRSLADDNIVRTVIEFLNYLHLKEVGALDSLPSSEETNQS

>XP\_005988074.1 PREDICTED: galanin peptides isoform X1 [Latimeria  
chalumnae]

MQKCASILCISLILCATLSETFGLVLSAKEKRGWTLNSAGYLLGPHAVDNHRSFSDKHGLAGKRELQT  
EEDVKLGSLRSLADDNVLRTVADFLNYLHLKDIGALDNLPSFFSSEETTQS

>NP\_001138861.1 galanin isoform 2 precursor [Gallus gallus]

MQRCVGFLLSLILCAALSETFGLVLSAKEKRGWTLNSAGYLLGPHAVDNHRSFNDKHGFTGKREIQP  
DEDIKAGNLGRPLADENIVRTVIEFLTYLHLKEAGALENLPSPEETNLS

>XP\_006642531.1 PREDICTED: galanin peptides isoform X2 [Lepisosteus  
oculatus]

MQKCFGVLCVSLVLCATLSETFGLVLSAKEKRGWTLNSAGYLLGPHAVDNHRSLSDKHGLAGKRELQL  
EDDIKSGSLRISDENVIRTVIDFLTYLRLKEMGALDNLHPSLTSEEVAQP

>XP\_005163049.1 galanin peptides isoform X1 [Danio rerio]

MHRCVGGVCVSLIVCAFLTETLGMVIAAKEKRGWTLNSAGYLLGPHAIDSHRSLSDKHGLAGKREMP  
DEDFKTGALRIADEDDVHTIIDFLSYLKLKEIGALDSLPSLTSEEISQP

>XP\_022539670.1 galanin peptides isoform X2 [Astyanax mexicanus]

MQKCVGVVSVSLILCAVLSETLGMVIAAKEKRGWTLNSAGYLLGPHAIDSHRPLSDKHGLAGKRD  
DFKSGALRITDEDTIHTIIDFLTYLRLKEVGALDNLPSLTSEELSQP

>XP\_016383745.1 PREDICTED: galanin peptides isoform X1  
[Sinocyclocheilus rhinocerosus]

MHRCVGGVCVSLIVCAFLTETLGMVIAAKEKRGWTLNSAGYLLGPHAIDSHRSLSDKHGLAGKREMP  
EEDFKTAALRISDEDDVYTIIDFLSYLKLKEMGALDSLPSLTSEEISQP

>XP\_020390621.1 galanin peptides [Rhincodon typus]

MPRFASLLCLSLVLCALVSHSFGLVLPKDKRGWTLNSAGYLLGPHAVDNHRSLSDKNGLAGKRELQL  
EDELKHGNLLQNLADESVARIAIEFLVYLHLKEIGALDNLPSLLSSEVPQP

>NM\_001292769.1 Callorhinchus milii galanin and GMAP prepropeptide  
(gal), mRNA

MPRCAALLCVSLVLCALSQCFGLSLLTKEKRGWTLNSAGYLLGPHAVDNHPSFNEKRGLAGKRELHL  
EDETNSDNVLQALTDENAILIVIEFLTYLRLKETGALDNLMPFSSSDVQP

>MSTRG.6959.2.p2 LAMPREY Petromyzon marinus

MQCSPRLICLALLVLAIAESHGMLVTEKEKRGWTLNSAGYLLGPTAMDQHRTLNLGLAGKRAAF  
EET FNTFGQKPLRVSTEDVLRAIIDYLNMYMHMKEARGLSTMPEDFFEDLPRQP

>NM\_001278965.1 Ciona intestinalis galanin-like peptide (ci-galp), mRNA  
(OUTGROUP, only used for the phylogenetic analysis).

MNSFGRYTFSLAVVLYISIVLCAENSEAATAKRPFRGQGGWTLNSVGYNAGLGALRKLFEKRDGSSLD  
VESMPLDNEEMENLAKDFALFLEVKESGLLGPRMLRCILSRNDQVMDSMSEM
